# Supplementary material
Source: PubMed Central journal article supplement (PMC9122741)
Supplement: mmc1.pdf [file mmc1.pdf]

Remdesivir (RDV)

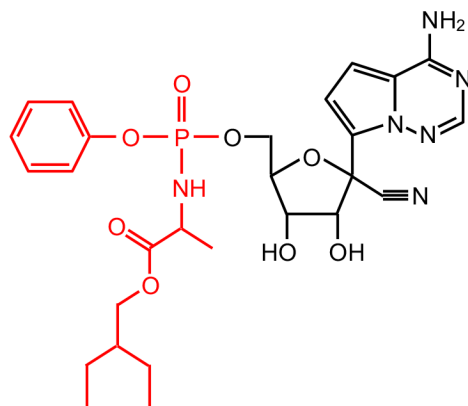

GS-441524

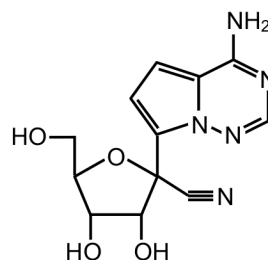

**Supplemental Figure 1.** Chemical structures of remdesivir and GS-441524. The moieties in RDV that are absent in GS-441524 are highlighted in red.
